# Supplementary material for: Germline susceptibility variants impact clinical outcome and therapeutic strategies for stage III colorectal cancer
Source: PubMed Central journal article supplement (PMC6408483; doi:10.1038/s41598-019-40571-0), 2019-03-08
Supplement: 41598_2019_40571_MOESM1_ESM.pdf [file 41598_2019_40571_MOESM1_ESM.pdf]

# **Germline susceptibility variants impact clinical outcome and therapeutic strategies for stage III colorectal cancer**

Peng-Chan Lin<sup>1,4</sup>, Yu-Min Yeh<sup>1,2</sup>, Pei-Ying Wu<sup>3</sup>, Keng-Fu Hsu<sup>3</sup>,

Jang-Yang Chang<sup>1,5</sup>, Meng-Ru Shen<sup>3,6</sup>

<sup>1</sup>Department of Internal Medicine, <sup>2</sup>Graduate Institute of Clinical Medicine, <sup>3</sup>Department of Obstetrics and Gynecology, <sup>6</sup>Department of Pharmacology, National Cheng Kung University Hospital, College of Medicine, National Cheng Kung University, Taiwan; <sup>4</sup>Department of Computer Science and Information Engineering, College of Electrical Engineering and Computer Science, National Cheng Kung University; <sup>5</sup>National Institute of Cancer Research, National Health Research Institutes, Taiwan

## **Supplementary information**

**Supplementary Figure S1.** Workflow for variant discovery and ClinVar annotations. Detailed description in Materials and Methods.

**Supplementary Figure S2.** Patients with or without cancer-associated genetic variants and their family cancer history pedigrees.

**Supplementary Figure S3.** Mutational signature in patients with cancer-associated genetic variants (CAG(+)) or without cancer associated genetic variants (CAG(-)).

**Supplementary Table 1.** Patients' clinical characteristics.

**Supplementary Table 2.** ACMG SF v2.0 genetic variants in cancer patients and normal subjects.

**Supplementary Table 3.** Ethnic-specific genetic variants in cancer patients and normal subjects.

**Supplementary Table 4.** Germline cancer-associated genetic variants in cancer patients.

**Supplementary Table 5.** Primary and recurrent tumor mutation variant allele frequency (VAF) and clusters.

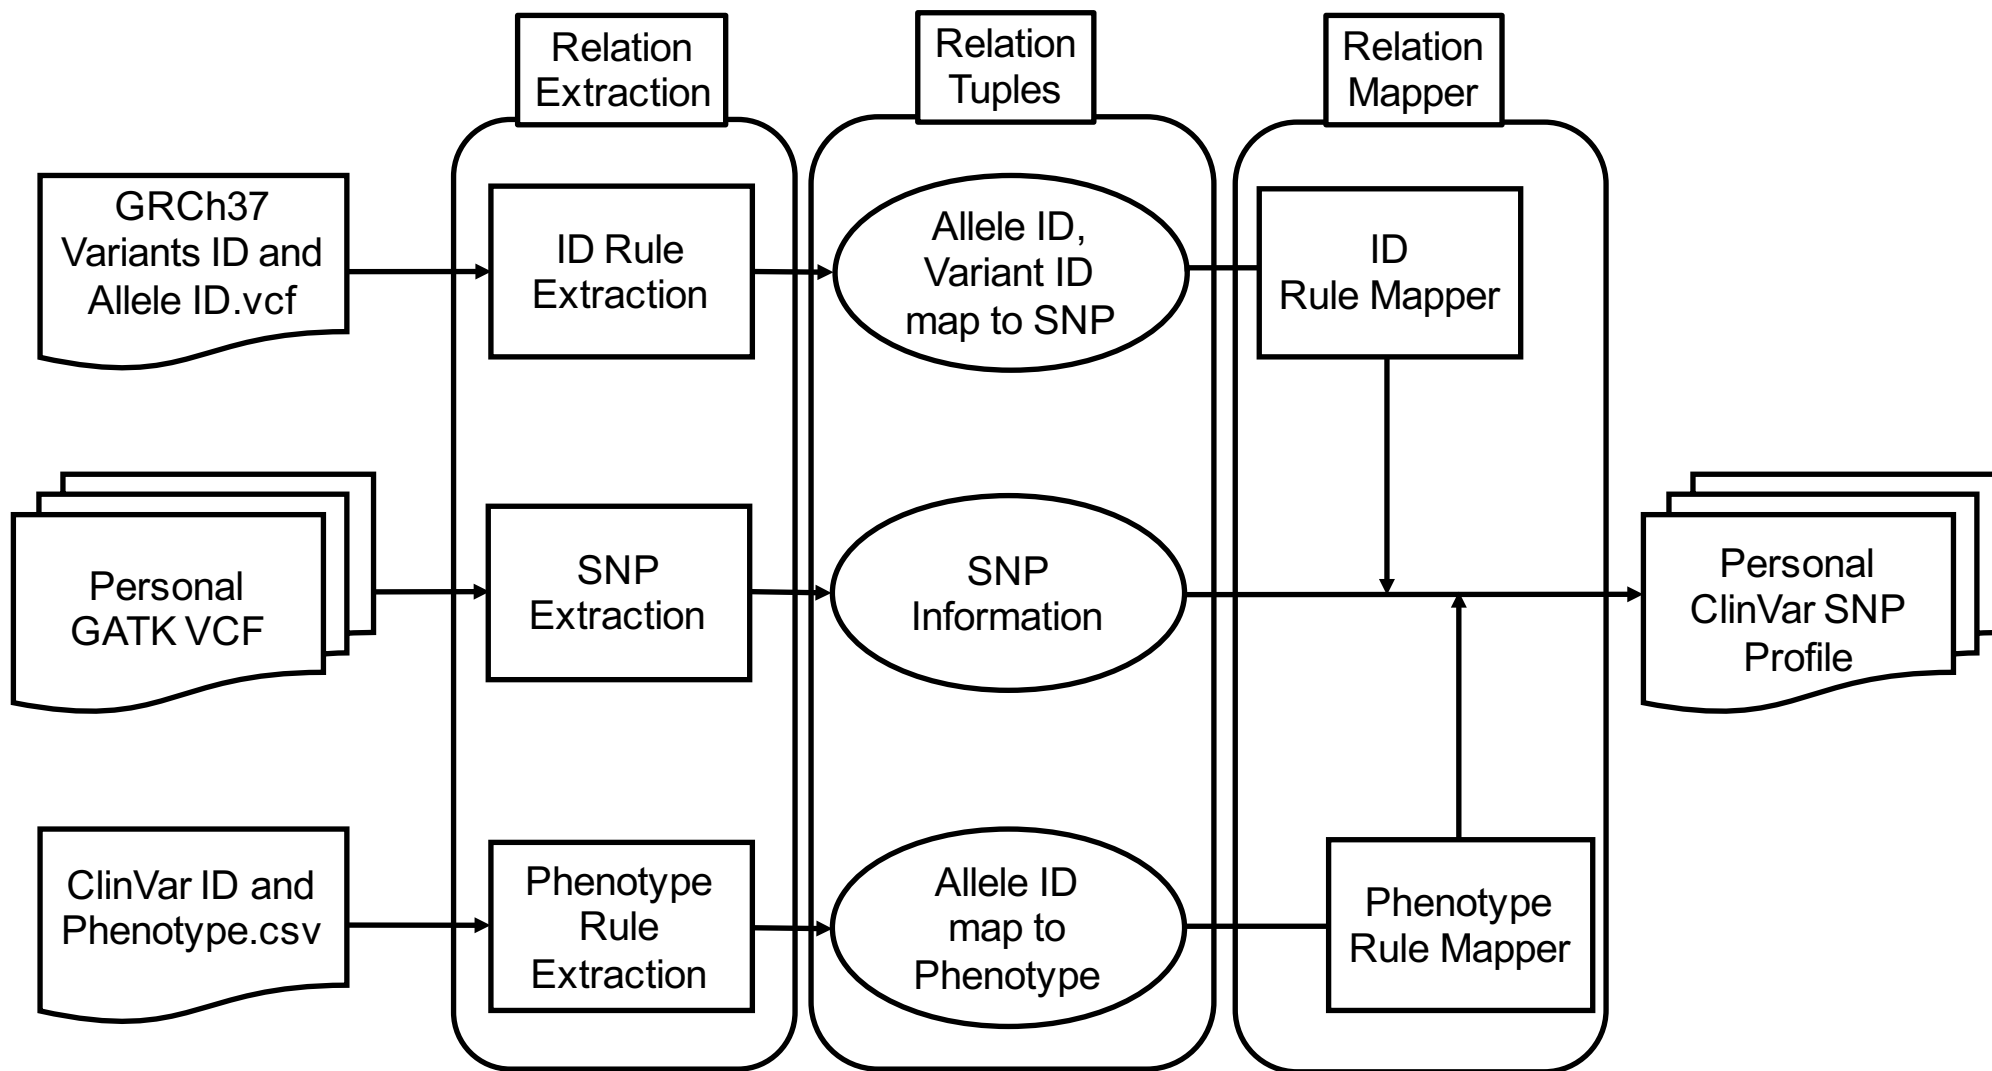

**Supplementary Figure S1.** Workflow for variant discovery and ClinVar annotations. Detailed description in Materials and Methods.

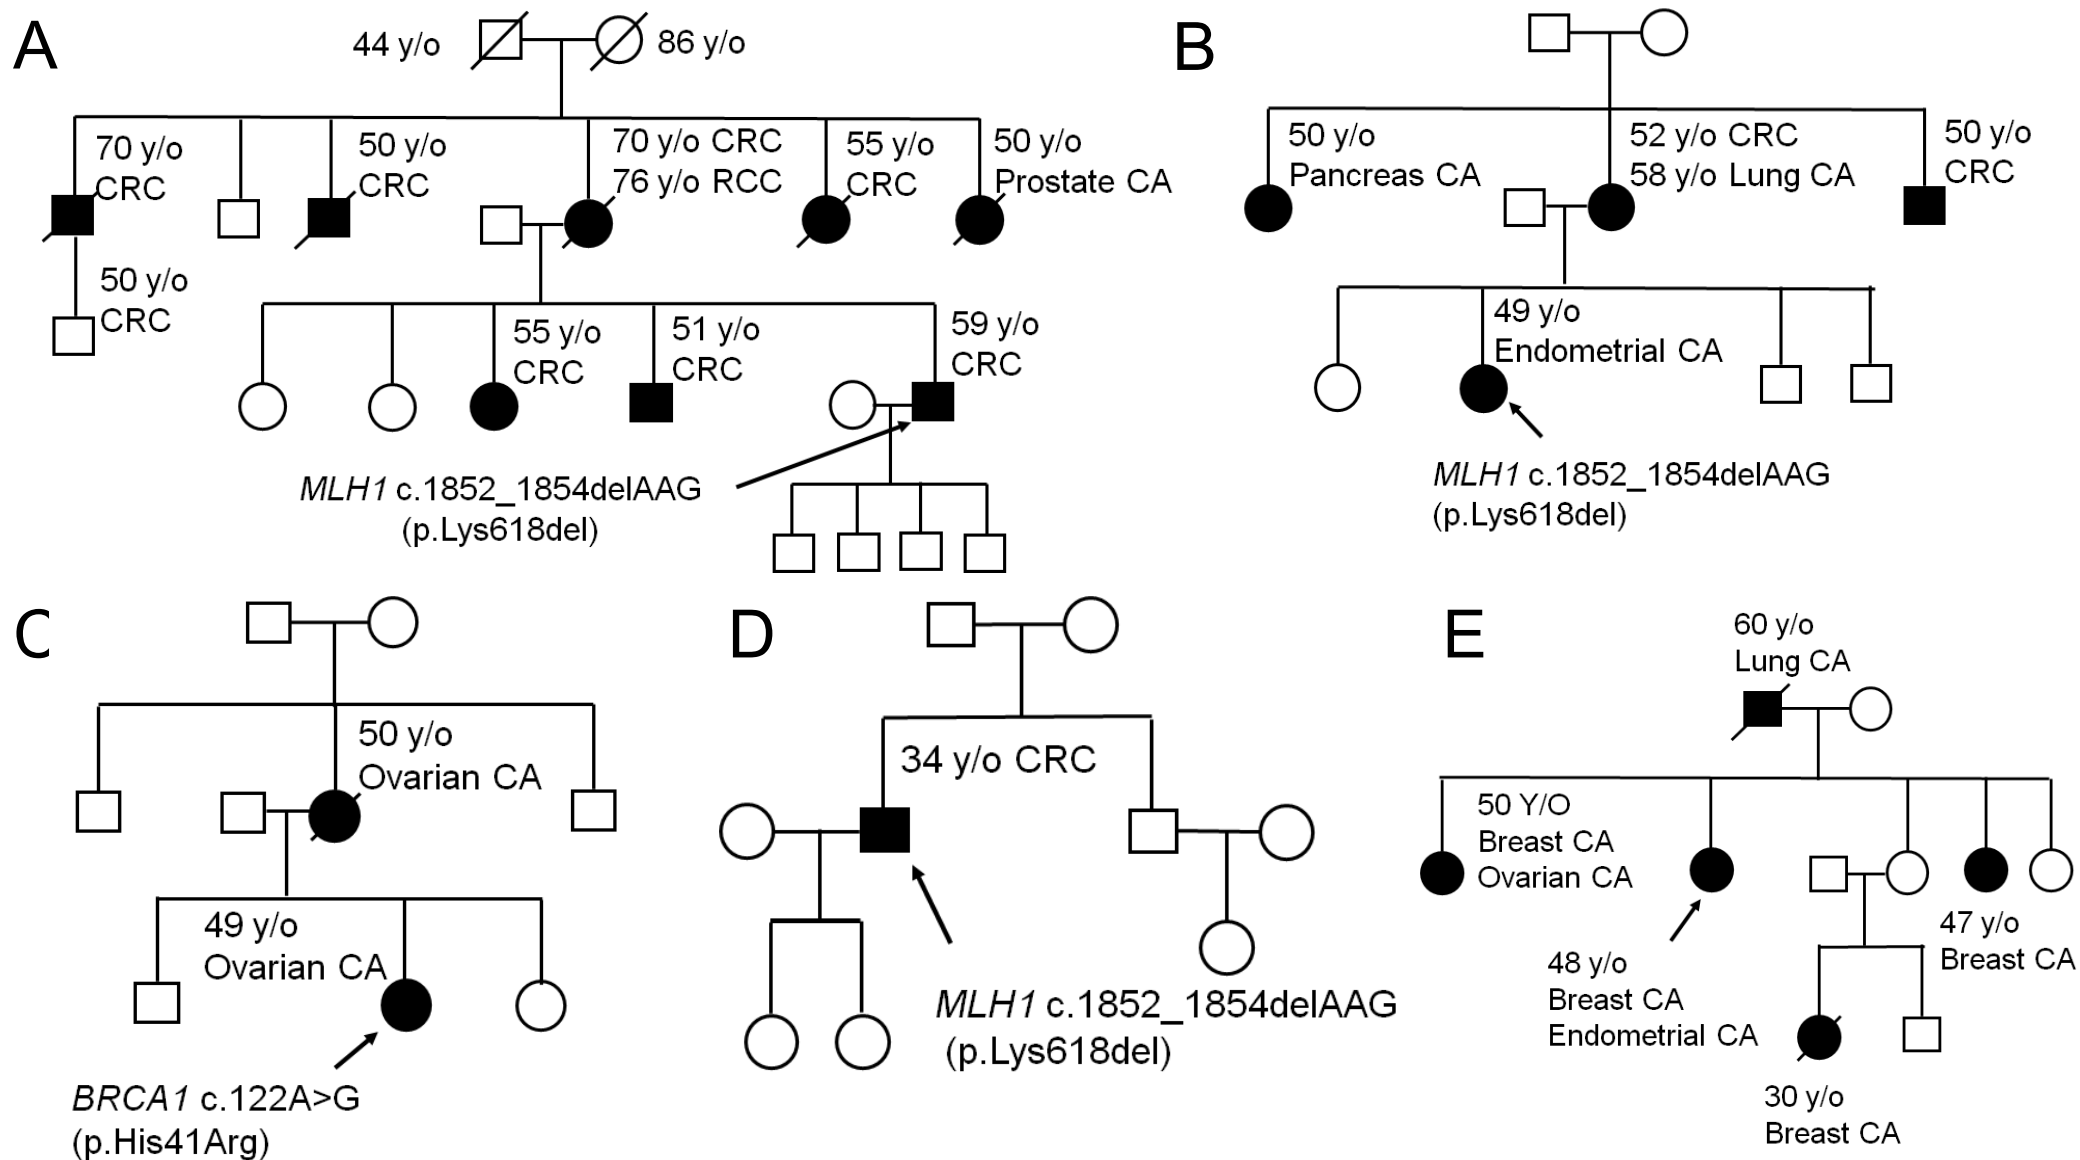

**Supplementary Figure S2.** Patients with or without cancer-associated genetic variants and their family cancer history pedigrees. Lynch syndrome was diagnosed in (A) one CRC patient and (B) one endometrial cancer patient. Both patients had a germline pathogenic variant of *MLH1* c.1852\_1854delAAG. (C) A germline pathogenic variant of *BRCA1* c.122A>G was detected in one ovarian cancer patient. (D). A *MLH1* pathogenic variant was detected in one CRC patient without cancer family history. (E) No well-known cancer-associated genetic variants is identified. Arrows indicate the patients enrolled in this study. A square represents a male and a circle represents a female. A solid square or circle indicates the person has cancer.

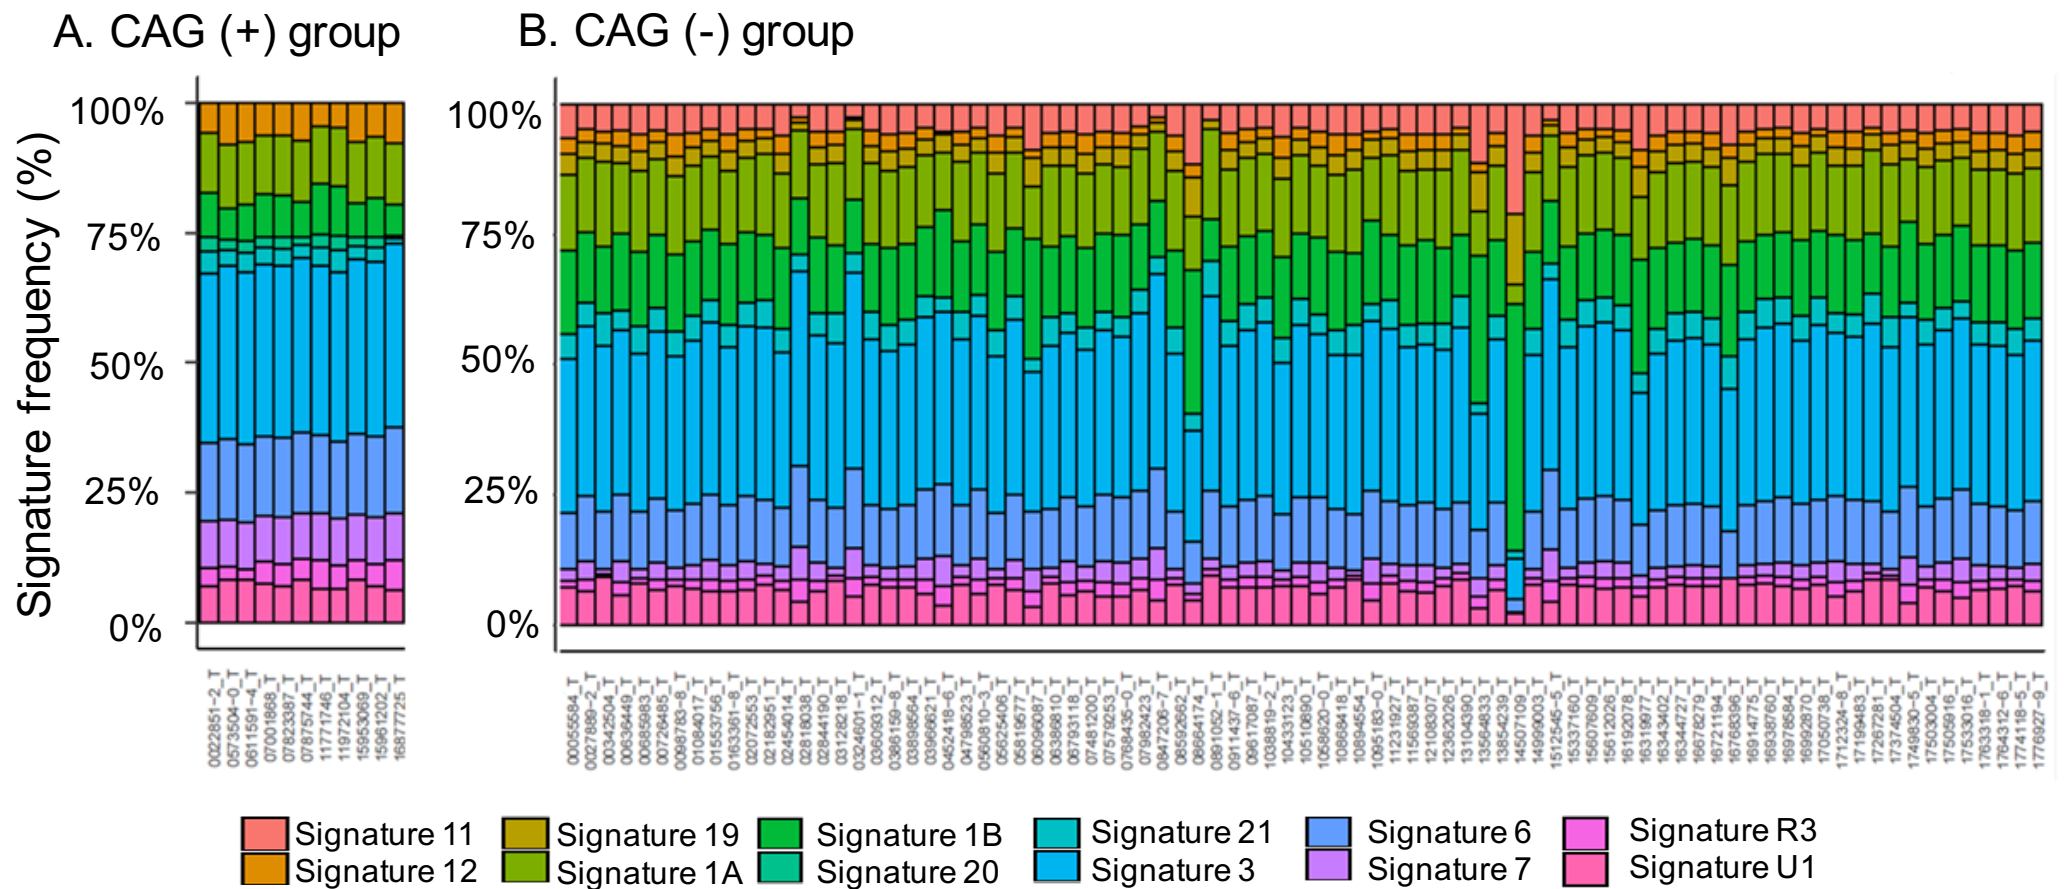

**Supplementary Figure S3.** Mutational signature in patients with cancer-associated genetic variants (CAG(+)) or without cancer associated genetic variants (CAG(-)). Mutational signature frequency (y-axis) in individual cancer patients (x-axis). Each color indicates a different mutational signature. Signatures 1B, 11, and 19 are predominant in patients without cancer-associated genetic variants.

**Supplementary table 1. Patients' clinical characteristics**

| Characteristics         | Patients number (%) |
|-------------------------|---------------------|
| Total                   | 159 (100)           |
| Median age, y/o (range) | 57 (23-82)          |
| Gender                  |                     |
| Male                    | 54 (34)             |
| Female                  | 105 (66)            |
| Tumor type              |                     |
| Colorectal              | 104 (65.4)          |
| Ovarian                 | 31 (19.5)           |
| Endometrial             | 24 (15.1)           |
| Cancer family history   |                     |
| No relatives            | 77 (48.4)           |
| First-degree relatives  | 63 (39.6)           |
| Second-degree relatives | 19 (11.9)           |
